# Supplementary material
Source: PubMed Central journal article supplement (PMC4150839)
Supplement: NIHMS614402-supplement-Supp_FigureS1-S3.pdf [file NIHMS614402-supplement-Supp_FigureS1-S3.pdf]

## Supplementary material for

### **Espl regulates the ESX-1 secretion system in response to ATP levels in *Mycobacterium tuberculosis***

Ming Zhang<sup>1,3,†</sup>, Jeffrey M. Chen<sup>1,4,†</sup>, Claudia Sala<sup>1</sup>, Jan Rybniker<sup>1,2</sup>, Neeraj Dhar<sup>1</sup> and Stewart T. Cole<sup>1\*</sup>

<sup>1</sup> Ecole Polytechnique Fédérale de Lausanne, Global Health Institute,  
Station 19, CH-1015, Lausanne, Switzerland

<sup>2</sup> 1<sup>st</sup> Department of Internal Medicine, University of Cologne, D-50937  
Cologne, Germany

Present addresses:

<sup>3</sup> Department of Biochemistry, Center of Immunity and Infection, University of  
Lausanne, Epalinges, Switzerland

<sup>4</sup> Vaccine and Infectious Disease Organization – International Vaccine Centre,  
University of Saskatchewan, Saskatoon, Canada

† Contributed equally

\* Corresponding author:

Prof. S.T. Cole

Ecole Polytechnique Fédérale de Lausanne, Global Health Institute

Station 19, 1015 Lausanne, Switzerland

Tel. +41 21 693 1851/ Fax +41 21 693 1790

Email: [stewart.cole@epfl.ch](mailto:stewart.cole@epfl.ch)

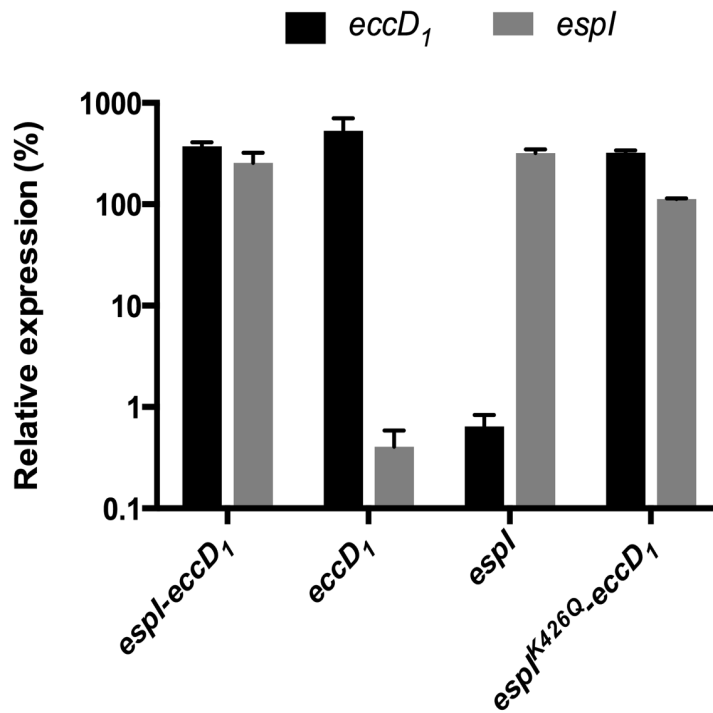

**Fig. S1.** Quantitative RT-PCR analysis of mRNA levels in *espI*::Tn mutant transformed with indicated plasmids. Relative expression levels of *espI* (black bars) and *eccD*<sub>1</sub> (grey bars) were calculated using the  $\Delta\Delta C_t$  method, normalizing transcripts levels to *sigA* signals. Data are shown as percentage relative to wild-type *M. tuberculosis*.

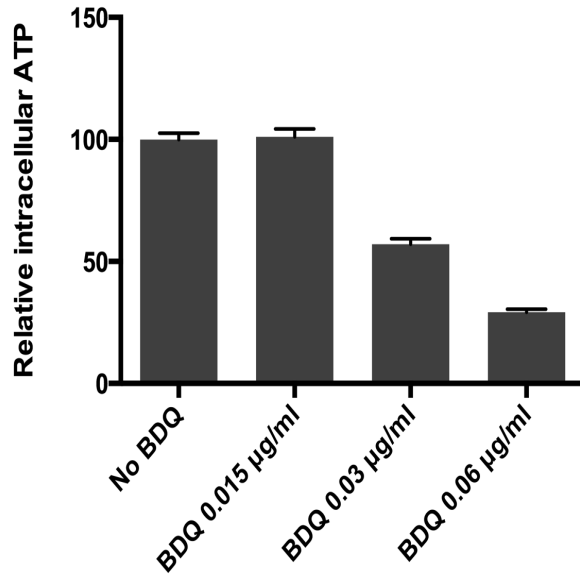

**Fig. S2.** Bactiter-Glo Assay of intracellular ATP levels in wild-type *M. tuberculosis* in 7H9 growing medium treated with BDQ for 8 hours at indicated concentrations. Data are shown as percentage relative to no treatment.

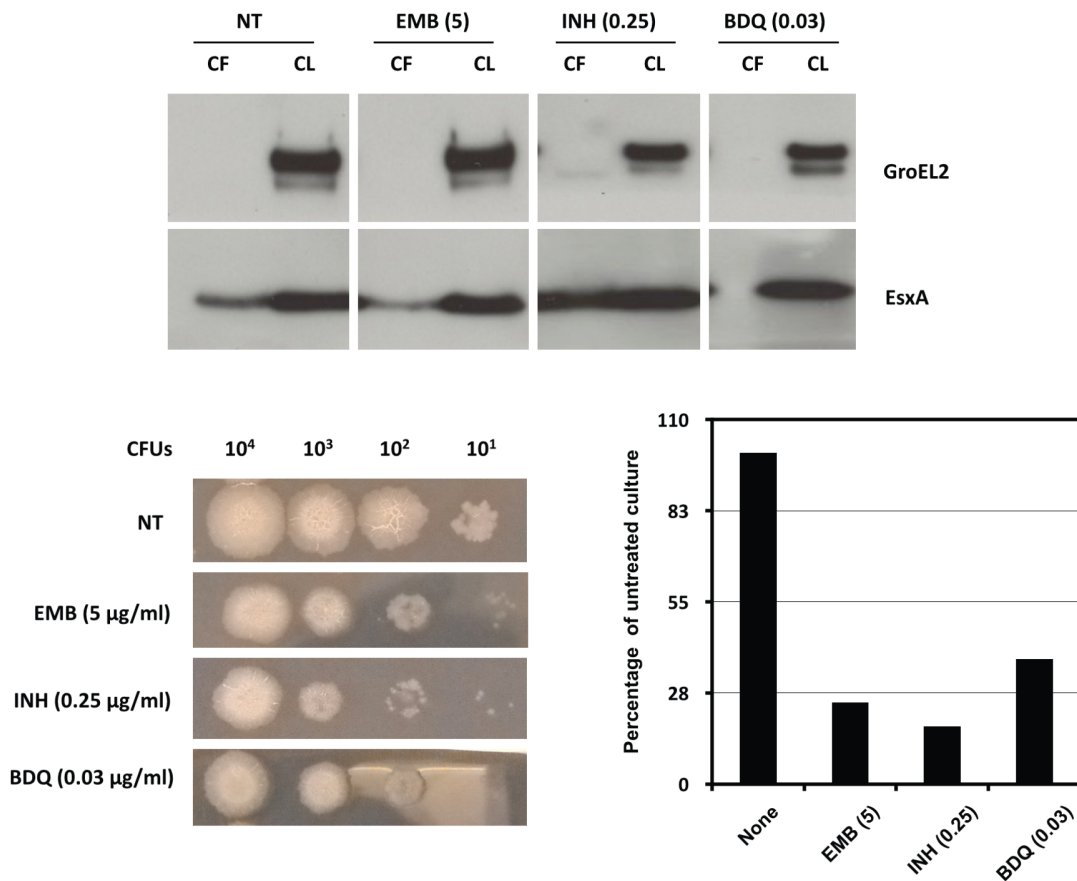

**Fig. S3.** Effect of drug treatment on ESX-1 secretion and growth

Top panel: Immunoblots of cell lysates (CL) at 5 µg/well and culture filtrates (CF) at 10 µg/well of wild-type *M. tuberculosis* Erdman strain grown in Sauton's medium without Tween-80 with addition of the indicated compounds for 5 days.

Bottom panels: Left – WT *M. tuberculosis* were treated with drugs at the indicated concentrations and 5 µl of cell suspension, containing the number of CFUs indicated per strain, were spotted on agar plates. Right – Survival of WT *M. tuberculosis* after treatment with drugs at the indicated concentrations by measuring OD<sub>600</sub> of cells in Sauton's medium. Data are representative of 2 independent experiments.

Antibodies used are indicated. NT – not treated.
